# Supplementary material for: Lecithin-Polysaccharide Self-Assembled Microspheres for Resveratrol Delivery
Source: MDPI journal article supplement (doi:10.3390/antiox11091666), 2022-08-26
Supplement: s1 [file s1]

## Supplementary materials

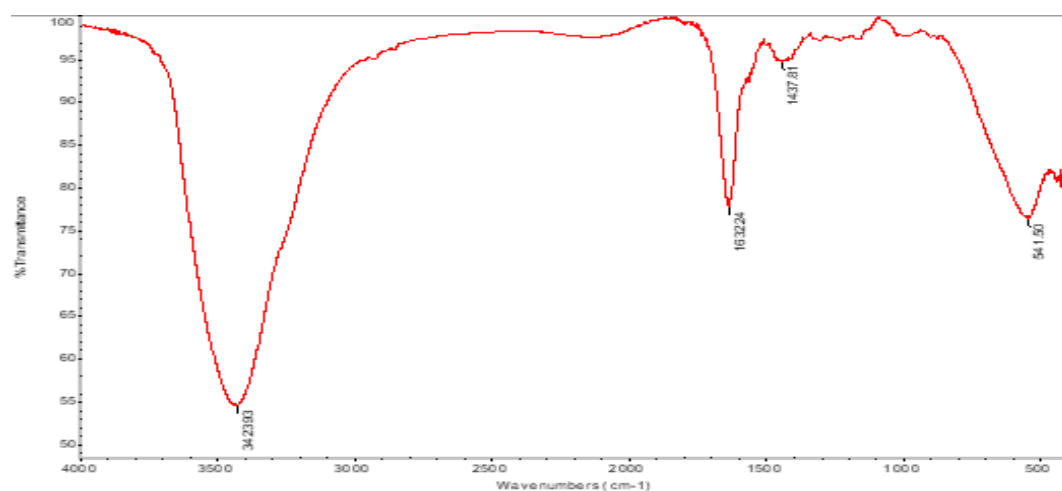

**Figure S1.** Fourier Transform Infrared (FTIR) spectra of polysaccharide self-assembled microspheres without resveratrol.

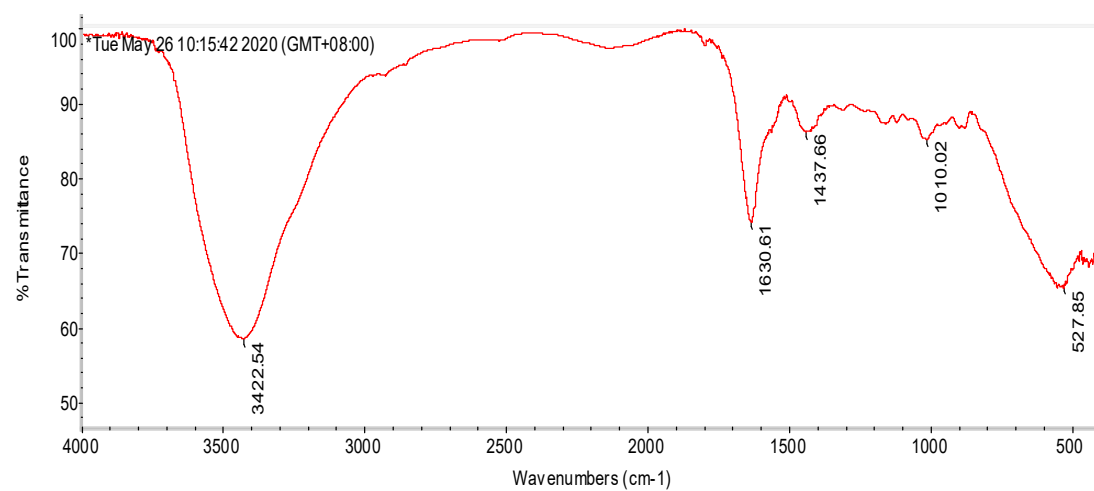

**Figure S2.** Fourier Transform Infrared (FTIR) spectra of lecithin-polysaccharide self-assembled microspheres without resveratrol

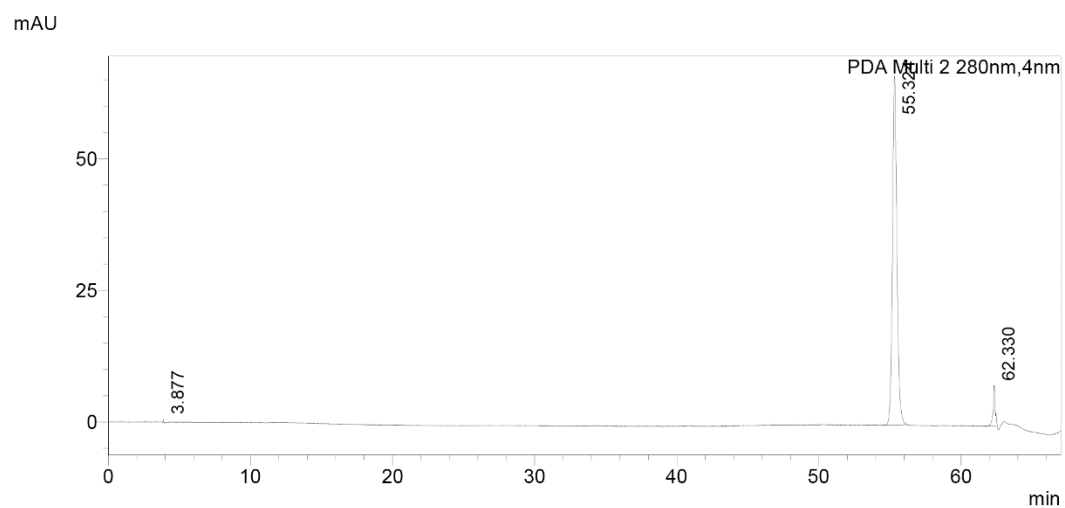

**Figure S3.** The High-performance liquid chromatography (HPLC) chromatogram of resveratrol standard.

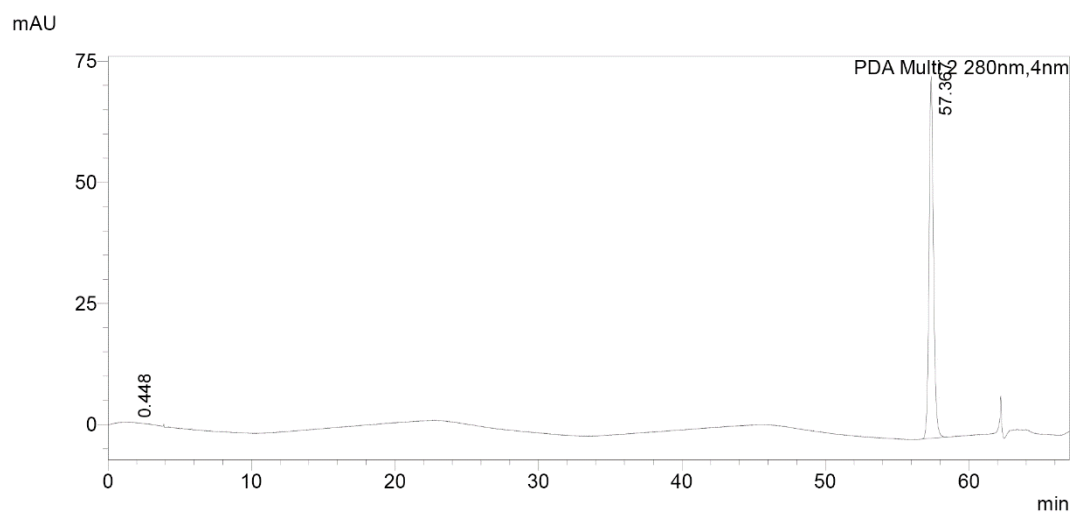

**Figure S4.** High-performance liquid chromatography (HPLC) chromatogram of polysaccharide self-assembled microspheres loaded resveratrol.

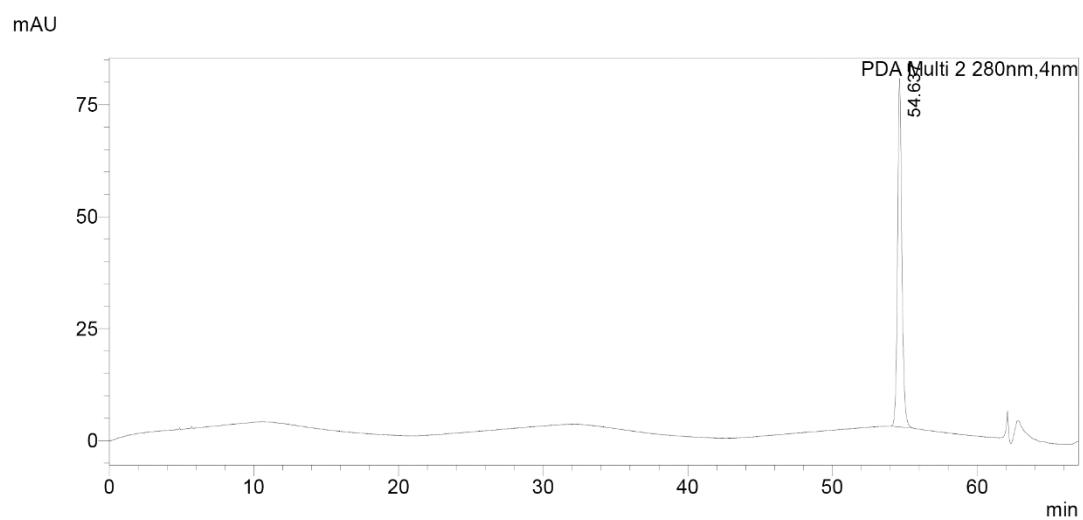

**Figure S5.** High-performance liquid chromatography (HPLC) chromatogram of lecithin-polysaccharide self-assembled microspheres loaded resveratrol

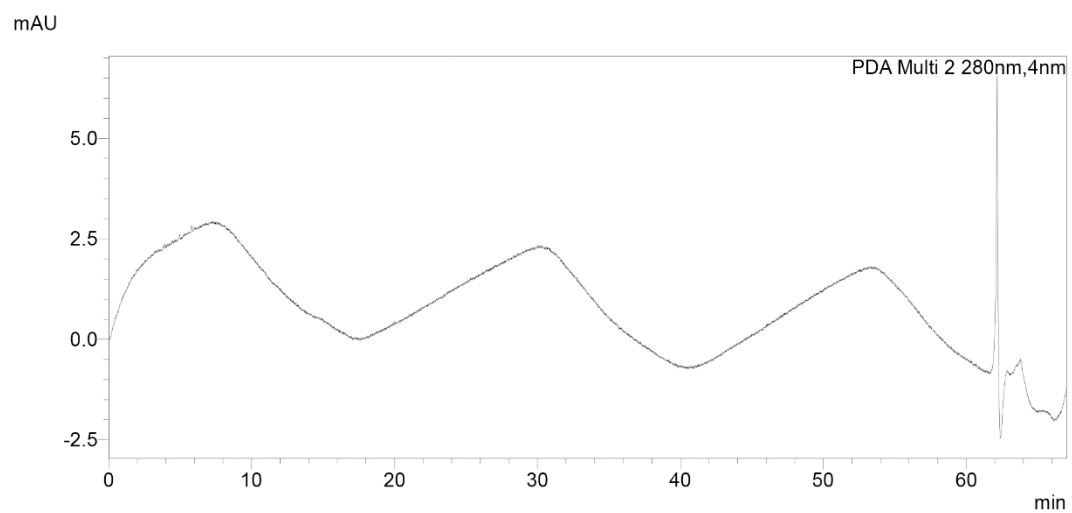

**Figure S6.** High-performance liquid chromatography (HPLC) chromatogram of polysaccharide self-assembled microspheres without resveratrol

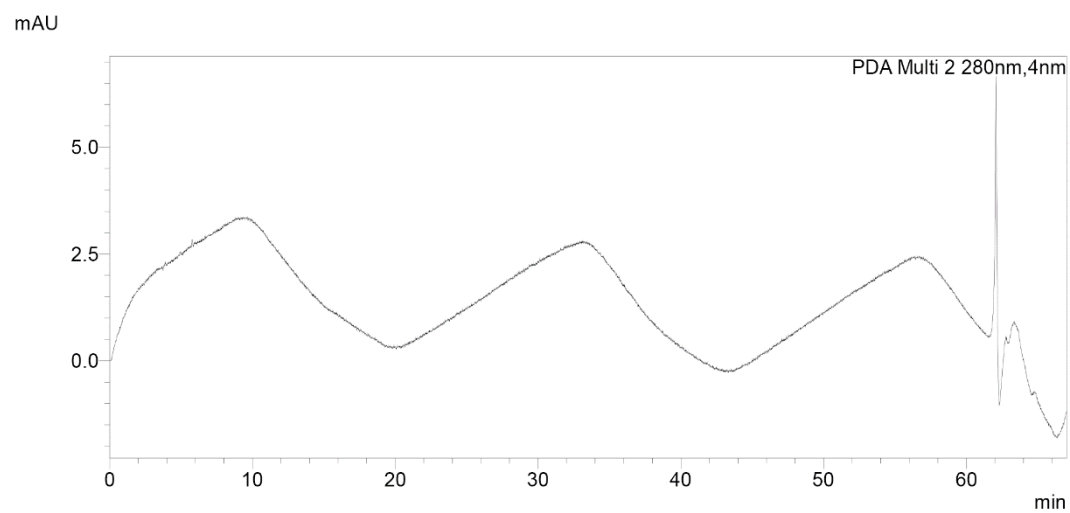

**Figure S7.** High-performance liquid chromatography (HPLC) chromatogram of lecithin-polysaccharide self-assembled microspheres without resveratrol.
